1                    **Large-scale voltage imaging in the brain using targeted illumination**

2  
3  
4                    **Sheng Xiao<sup>1\*</sup>, Eric Lowet<sup>1\*</sup>, Howard J. Gritton<sup>1,2\*</sup>, Pierre Fabris<sup>1</sup>, Yangyang Wang<sup>1</sup>, Jack**  
5                    **Sherman<sup>1</sup>, Rebecca Mount<sup>1</sup>, Hua-an Tseng<sup>1</sup>, Heng-Ye Man,<sup>3</sup> Jerome Mertz<sup>1</sup> and Xue Han<sup>1#</sup>**

6                    <sup>1</sup>*Boston University, Department of Biomedical Engineering, Boston, MA 02215*

7                    <sup>2</sup>*Department of Comparative Biosciences, University of Illinois, Urbana, IL 61802*

8                    <sup>3</sup>*Boston University, Department of Biology, Boston, MA 02215*

9  
10  
11                    \*These authors contributed equally.

12                    #Correspondence: xuehan@bu.edu

13  
14                    **Keywords:** Optical Imaging, voltage sensors, plasma membrane voltage, spikes,  
15                    electrophysiology, coherence, epi-fluorescence microscopy

16  
17  
18  
19                    **Abstract**

20                    Recent improvements in genetically encoded voltage indicators enabled high precision imaging  
21                    of single neuron's action potentials and subthreshold membrane voltage dynamics in the  
22                    mammalian brain. To perform high speed voltage imaging, widefield microscopy remains an  
23                    essential tool to record activity from many neurons simultaneously over a large anatomical area.  
24                    However, the lack of optical sectioning makes widefield microscopy prone to background signal  
25                    contamination. We implemented a simple, low cost, targeted illumination strategy based on a  
26                    digital micromirror device (DMD) to restrict illumination to the cells of interest to improve  
27                    background rejection, and quantified optical voltage signal improvement in neurons expressing  
28                    the fully genetically encoded voltage indicator SomArchon. We found that targeted illumination,  
29                    in comparison to widefield illumination, increased SomArchon signal contrast and reduced  
30                    background cross-contamination in the brains of awake mice. Such improvement permitted the  
31                    reduction of illumination intensity, and thus reduced fluorescence photobleaching and prolonged  
32                    imaging duration. When coupled with a high-speed sCMOS camera, we routinely imaged tens of  
33                    spiking neurons simultaneously over several minutes in the brain. Thus, the DMD-based targeted  
34                    illumination strategy described here offers a simple solution for high-speed voltage imaging  
35                    analysis of large scale network at the millisecond time scale with single cell resolution in the brains  
36                    of behaving animals.

## 37 **Introduction**

38 Recent advances in genetically encoded voltage indicators (GEVIs) have enabled neuroscientists  
39 to directly measure membrane voltage from individual neurons in the mammalian brains<sup>1-6</sup>. In  
40 particular, a few recent GEVIs, including SomArchon, QuasAr3, Voltron, ASAP3 and Ace2N, have  
41 achieved sufficient sensitivity to capture individual action potentials from single neurons in  
42 behaving mice. Of these high performance GEVIs, several are fully genetically encoded, whereas  
43 others are hybrid sensors that require exogenous chemicals<sup>8-14, 17</sup>. One class of fully genetically  
44 encoded indicators detects voltage dependent fluorescence of fluorophores fused to voltage  
45 sensitive peptide domains derived from voltage gated ion channels, voltage sensitive  
46 phosphatases or rhodopsins<sup>8-14</sup>. For these GEVI designs, changes in plasma membrane voltage  
47 induce conformational transitions of the voltage sensitive domains, which subsequently alter the  
48 absolute fluorescence intensity or the efficiency of Forster resonance energy transfer of the  
49 tethered fluorophores. A recent example is ASAP3 that measures voltage dependent fluorescence  
50 of a circularly permuted GFP fused to the voltage sensing domain of *G. gallus* voltage-sensing  
51 phosphatase<sup>4</sup>. Another class of fully genetically encoded indicators is single compartment and  
52 directly detects the intrinsic voltage dependent fluorescence of engineered rhodopsins, such as  
53 QuasAR3, Archon and SomArchon<sup>3,5,15</sup>. To improve fluorescence signals, bright chemical  
54 fluorophores have also been explored in the design of GEVIs, yielding a class of high-performance  
55 hybrid GEVIs that requires both exogenous chemical dyes and the corresponding voltage sensing  
56 protein counterparts<sup>2,16,17</sup>.

57

58 With rapid and continued improvements of GEVIs, voltage imaging offers great promise for direct  
59 analysis of neuronal voltage dynamics in the brain. To capture fast membrane voltage  
60 fluctuations, especially action potentials that occur on the millisecond and sub-millisecond time  
61 scale, fluorescence voltage imaging needs to be performed at a near kilohertz sampling speed.  
62 Point scanning techniques, such as multiphoton microscopy, have minimum signal cross-  
63 contamination and out-of-focus background due to confined excitation volumes<sup>18</sup>, but are  
64 generally limited to video-rate acquisition speed due to the use of mechanical scanners. Fast  
65 random access scanning using acousto-optic deflectors has been demonstrated with kilohertz  
66 sampling rates<sup>4</sup>, though these devices require a complicated setup, are sensitive to motion  
67 artifacts, and more importantly, can only record very few pre-selected cells at once. More  
68 recently, kilohertz frame rate two-photon imaging over a field-of-view (FOV) of  $50 \times 250 \mu\text{m}^2$  has  
69 been demonstrated by means of passive pulse splitting from a specialized low-repetition rate  
70 laser<sup>19</sup>. However, its stringent alignment requirements, high cost, and concerns regarding long-  
71 term system stability remain a major obstacle for its widespread use for neuroscience studies.

72

73 Alternatively, widefield microscopy, especially when equipped with the newly developed high-  
74 speed large-area sCMOS cameras, remains a cost-effective and easily implementable solution for  
75 wide FOV, kilohertz frame-rate imaging. This ability to image a large FOV at high spatiotemporal  
76 resolution is particularly critical to resolving morphological details of individual neurons, and to  
77 correct for tissue movement associated with physiological processes (i.e., heart rate, breathing)  
78 that are unavoidable when imaging the brains of awake behaving animals. However, a major  
79 limitation of widefield microscopy is the inability to reject out-of-focus and scattered light<sup>20</sup>,  
80 making it prone to signal contamination and background shot noise caused by non-specific  
81 excitations<sup>21</sup>. To address this problem molecularly, recently developed GEVIs have utilized soma

82 targeting peptides<sup>22</sup>, such as the axon initial segment targeting motif of the potassium channel  
83 Kv2.1, which successfully restrict the expression of GEVIs to soma or proximal dendrites. For  
84 example, SomArchon, QuasAr3, Voltron, and ASAP3-kv all include such soma targeting motifs,  
85 which are critical for their success in measuring membrane voltage in the brains of behaving  
86 animals, using widefield or two-photon microscopes<sup>2-6</sup>. Restricting the expression of GEVIs to a  
87 sparse subset of neurons can also help reduce background signal contamination, and this strategy  
88 was recently used to achieve simultaneous imaging of tens of neurons using the hybrid sensor  
89 Voltron<sup>2</sup>.

90

91 In parallel with molecular targeting of GEVIs, targeted illumination in optical microscopy design  
92 has been proposed as a simple strategy to improve upon a widefield microscopy for enhancing  
93 image contrast and improving signal-to-noise ratio (SNR)<sup>23</sup>. For example, by targeting illumination  
94 to cell bodies or plasma membranes, voltage imaging performance has been significantly  
95 improved<sup>4-6</sup>. However, limited by the attainable FOV and weak GEVI fluorescence contrast,  
96 voltage imaging in the intact brain has largely been limited to simultaneous sampling of few cells.  
97 To reduce out-of-focus light, and to improve voltage imaging performance, we integrated a  
98 simple, low cost, targeted illumination strategy into a standard widefield microscope, where a  
99 digital micromirror device (DMD) was used to restrict the illumination light to specific neurons of  
100 interest. We directly compared SomArchon imaging performance of the same neurons under  
101 targeted versus widefield illumination, in both cultured neuron preparations, and from the brains  
102 of awake behaving mice. We found that illumination targeting reduced nonspecific background  
103 fluorescence and fluorescence signal cross-contamination, leading to increased SomArchon spike  
104 signal-to-background ratio. The improvement of SomArchon fluorescence contrast allows us to  
105 decrease the total excitation power over the FOV that reduces fluorescence photobleaching. With  
106 targeted illumination, we are able to perform routine SomArchon voltage imaging from tens of  
107 neurons over a large anatomical area of  $360 \times 180 \mu\text{m}^2$ , and over a prolonged recording duration  
108 of several continuous minutes. These results demonstrate that targeted illumination with a DMD  
109 represents a simple, low cost, and practical strategy for large scale voltage imaging of tens of  
110 neurons over an extended period of time in awake behaving animals.

111

112 **Results**

113 *Modeling and testing the effects of targeted illumination on optical crosstalk in widefield optical*  
114 *imaging*

115 Motivated by the unique advantage of widefield microscopy in performing optical voltage imaging  
116 with high spatiotemporal resolution over large FOVs, we considered a targeted illumination  
117 approach to further enhance signal quality by reducing out-of-focus background signals. We first  
118 developed a theoretical model to estimate how targeted illumination minimizes signal crosstalk  
119 due to out-of-focus excitation or tissue scattering from nearby neurons that are not actively being  
120 imaged. We considered contributions from both out-of-focus fluorescence and tissue scattering,  
121 by modeling light propagation through scattering media using the radiative transfer equation in  
122 the forward scattering limit<sup>24</sup> (see Methods and Fig. S1). In our model, we characterized crosstalk  
123 values from non-targeted neurons at distance  $D_x$  laterally and  $D_z$  axially from a region of interest  
124 (ROI) under widefield versus targeted illumination conditions (Fig. 1a,b, Fig. S3). We found that in  
125 simulated fluorescence images, targeting illumination to a specific neuron substantially reduced  
126 the overall background in the imaging plane, and therefore reduced the strength of crosstalk from  
127 neighboring neurons (red circle: Fig. 1d,e). Additionally, the level of crosstalk contamination from  
128 a non-overlapping axially displaced neuron is strongly affected by the distance between the out-  
129 of-focus neurons relative to the imaging plane (Fig. 1c). These findings confirm that, for widefield  
130 microscopy, targeting illumination to a neuron of interest can improve signal quality by reducing  
131 the overall fluorescence background, and limiting signal contamination from neighboring out-of-  
132 focus neurons. These computational results highlight that targeted illumination is a viable  
133 approach for low-background, high-contrast imaging of voltage signals in the brain using widefield  
134 microscopy.

135

136 To experimentally evaluate the improvement of targeted illumination, we integrated a DMD into  
137 a custom-built widefield microscope configured for dual color GFP and SomArchon imaging (Fig.  
138 1h). We performed voltage imaging of SomArchon expressing neurons, in both cell cultures and  
139 in the visual cortex and the hippocampus of awake head fixed mice. Since SomArchon protein is  
140 fused to the GFP reporter, static GFP fluorescent images were first taken to identify SomArchon  
141 expressing neuronal soma. The GFP fluorescence images were then used to generate templates  
142 for targeting illumination to the identified SomArchon positive neurons. Consistent with what was  
143 observed in our computational models, we found that restricting illumination to the soma  
144 reduced the overall background fluorescence and accordingly enhanced the contrast of  
145 SomArchon fluorescence in individual cells (Fig. 1f,g).

146

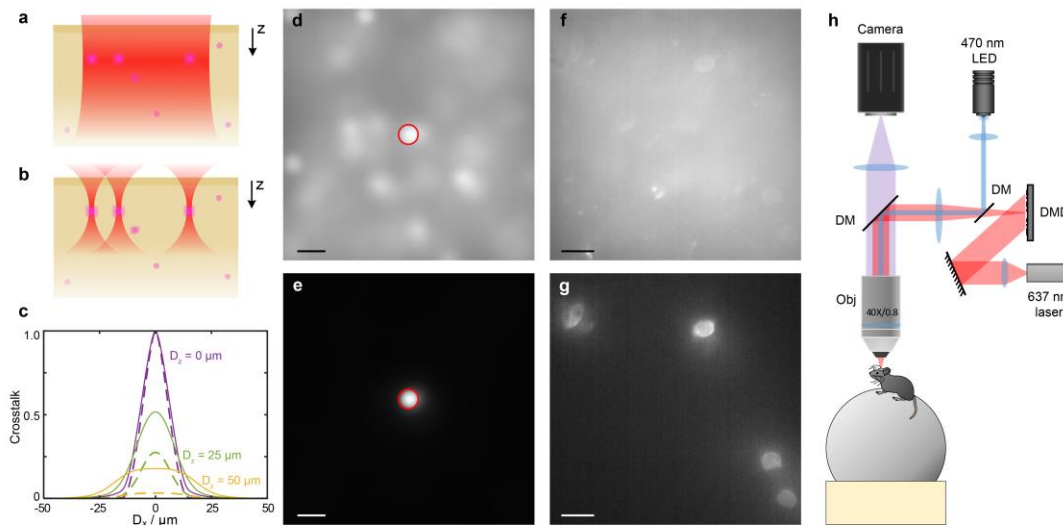

147

148 **Figure 1:** Theoretic models of targeted illumination on fluorescence crosstalk in widefield optical  
 149 imaging and a microscopy design for experimental testing in awake mice. (a,b) Illustration of the  
 150 theoretical consideration of fluorescence imaging of individual neurons using widefield  
 151 illumination (a) and targeted illumination (b). Purple dots illustrate the location of individual  
 152 SomArchon expressing neurons. Red area illustrates the illumination beam for SomArchon  
 153 excitation. (c) Characterization of fluorescence crosstalk values from a non-targeted neuron at a  
 154 lateral distance  $D_x$  and axial distance  $D_z$  away from the neuron of interest under widefield and  
 155 targeted illumination conditions. Solid lines, widefield illumination; dashed line, targeted  
 156 illumination. Purple,  $D_z = 0 \mu\text{m}$ ; green,  $D_z = 25 \mu\text{m}$ ; yellow,  $D_z = 50 \mu\text{m}$ . (d,e) Simulated images of  
 157 fluorescence from a single neuron under widefield illumination (d) and targeted (e) illumination.  
 158 Illumination target is indicated by the red circle. (f,g) An example widefield versus targeted  
 159 illumination voltage imaging experiment in an awake head fixed mouse positioned on a spherical  
 160 treadmill shown in (h). SomArchon fluorescence of visual cortex neurons imaged with widefield  
 161 illumination (f), and targeted illumination (g) of 4 individual neurons under the same laser power  
 162 density. (h) Experimental setup. DM, dichromatic mirror; Obj, objective lens. Scale bars are  $20 \mu\text{m}$ .

163

164 Targeted illumination increases spike spike-to-baseline (SBR) ratio and reduces SomArchon  
 165 photobleaching in cultured neurons

166 We first examined whether targeted illumination improves SomArchon voltage imaging quality in  
 167 cultured neurons transduced with AAV9-syn-SomArchon. Cultured neurons on flat glass coverslips  
 168 have little out-of-focus fluorescence originating from the out of plane z-axis, and therefore should  
 169 only exhibit small amount of signal contamination (Fig. S2). To directly compare the effects of  
 170 targeted versus widefield illumination, we alternated 20-second long imaging trials between the  
 171 two illumination conditions for the same FOV ( $n = 226$  neurons recorded from 16 FOVs).

172

173 Cultured neurons exhibit spontaneous subthreshold membrane voltage fluctuations that  
 174 occasionally produce action potentials. Since SomArchon can detect subthreshold voltage

175 dynamics<sup>3</sup>, the actual photon shot noise is mixed with real biological subthreshold voltage  
176 fluctuations. Therefore, it is difficult to quantify the actual noise level and therefore accurately  
177 evaluate SomArchon signal qualities by calculating the absolute signal to noise ratio. We thus  
178 calculated the spike-to-baseline ratio (SBR), defined as the amplitude of the spike divided by the  
179 amplitude of the baseline fluctuations, as an estimated performance metric of SomArchon in  
180 recording individual spikes. Since neurons in intact networks have heterogenous synaptic input  
181 patterns and membrane biophysical properties, this spike SBR measure is an underestimation of  
182 SomArchon performance, but it provides an intuitive measure of the optical voltage signal quality  
183 when the subthreshold membrane potential cannot be precisely controlled.

184 With targeted illumination, we detected a spike SBR of  $5.7 \pm 2.0$  (mean  $\pm$  standard deviation, from  
185 226 neurons in 16 FOVs), significantly greater than that observed from the same neurons under  
186 the widefield illumination condition ( $4.9 \pm 1.4$ , Fig. 2h). Since the spike identification algorithm  
187 relies on a custom spike SBR threshold, we investigated whether the increase in spike SBRs  
188 depends on the threshold used to identify spikes. We found that across several chosen SBR  
189 threshold values, targeted illumination consistently resulted in greater spike SBRs than widefield  
190 illumination (Fig. S4, Table S3). Furthermore, targeted illumination resulted in more detected  
191 spikes than that detected from the same neurons measured in the widefield condition (Fig. 2i).

192

193 We next examined fluorescence decay, calculated as the percent reduction of fluorescence  
194 intensity over time, an important parameter that limits the duration of fluorescence imaging in  
195 general. We found that with targeted illumination, SomArchon showed a slight fluorescence  
196 decay of  $2.15 \pm 2.66\%$  (mean  $\pm$  standard deviation,  $n = 226$  neurons) over a 20 s period,  
197 significantly smaller than that observed under widefield illumination ( $2.99 \pm 1.04\%$ , Fig. 2j).  
198 Together, these results demonstrate that targeted illumination significantly improves SomArchon  
199 performance in terms of spike SBR and fluorescence decay, even in cultured neurons where out-  
200 of-focus background is minimal.

201

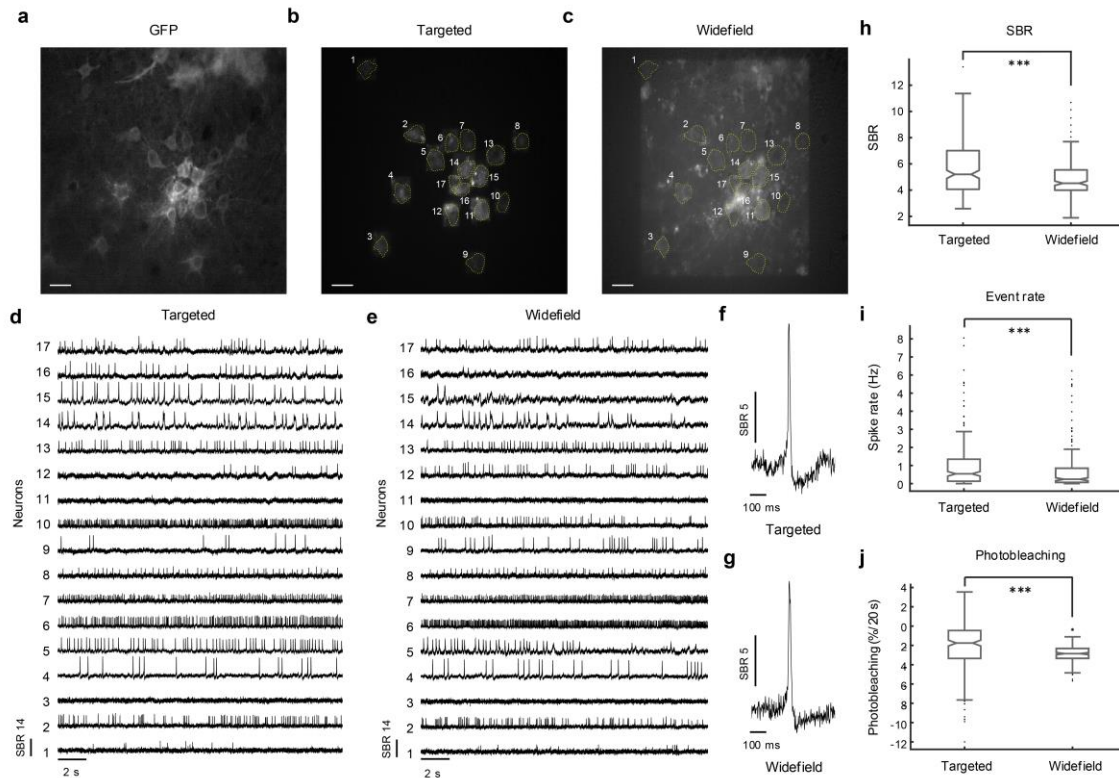

202

203 **Figure 2. Targeted illumination increases spike SBR and reduces fluorescence decay in cultured**  
 204 **neurons.** (a-c) An example FOV showing cultured neurons expressing SomArchon fused to a static  
 205 GFP fluorophore; scale bars are 20  $\mu\text{m}$ . (a) GFP fluorescence image under widefield illumination.  
 206 (b) SomArchon fluorescence under targeted illumination. (c) SomArchon fluorescence under  
 207 widefield illumination. (d, e) Example SomArchon fluorescence traces of 17 simultaneously  
 208 recorded neurons in the FOV illustrated in A, using targeted illumination (d), and widefield  
 209 illumination (e). (f, g) Example individual spikes recorded from the same neuron with targeted  
 210 illumination (f) and with widefield illumination (g). (h) Spike SBR (\*\*\*,  $p = 6.73e^{-14}$ , paired t-test  
 211 comparing targeted illumination versus widefield illumination conditions,  $df = 204$ ,  $n = 226$   
 212 neurons from 16 FOVs). (i) Spike rate identified with a spike SBR threshold of 4.5 (\*\*\*,  $p = 4.23e^{-5}$ ,  
 213 paired t-test,  $df = 225$ ). (j) Reduction of SomArchon fluorescence over 20 seconds period (\*\*\*,  $p =$   
 214  $9.06e^{-7}$ , paired t-test,  $df = 225$ ). The illumination power density was  $\sim 2 \text{ W/mm}^2$  for both the target  
 215 illumination and the widefield illumination conditions, for all recordings from cultured neurons.  
 216 For all boxplots, the box indicates the median (middle line), 25th (Q1, bottom line), 75th (Q3, top  
 217 line) percentiles, and the whiskers are  $Q1-1.5*(Q3-Q1)$ , and  $Q3+1.5*(Q3-Q1)$ . Outliers that exceed  
 218 these values are shown as dots.

219

220 Targeted illumination increases the cross-correlation of spikes, but minimally impacts cross-  
 221 correlation of subthreshold membrane voltage in neuron cultures

222 With a high speed sCMOS camera, we were able to simultaneously image 2 - 28 neurons ( $14.13 \pm$   
 223  $7.59$ , mean  $\pm$  standard deviation, from 16 FOVs) at 500 Hz over a FOV of  $360 \times 180 \mu\text{m}^2$ . To  
 224 estimate how targeted illumination can reduce signal crosstalk, we calculated the cross-  
 225 correlation between neuron pairs, for both subthreshold voltage fluctuations (Vm) and spikes.  
 226 We found that both Vm-Vm and spike-spike correlation decreased slightly with increasing

227 anatomical distance between simultaneously recorded neuron pairs (slopes for linear regression  
228 between Vm-Vm correlation and distance are  $-5.3e^{-4}$  and  $-3.7e^{-4}$  for targeted illumination and  
229 widefield illumination respectively, and between spike-spike correlation and distance are  $-1.7e^{-4}$   
230 and  $-7.2e^{-5}$  respectively, Fig. 3a,b). The regression slopes of Vm-Vm correlation and spike-spike  
231 correlation over anatomical distance under targeted illumination condition are both greater than  
232 that observed during widefield illumination condition (Vm-Vm correlation,  $p = 5.3592e^{-6}$ , z score  
233 =  $-4.5502$ , permutation test; spike-spike correlation,  $p = 0.0039$ , z score =  $-2.8865$ ).

234

235 To further evaluate changes in Vm-Vm and spike-spike correlation between the two illumination  
236 conditions across different anatomical distances, we binned the correlation values of neuron pairs  
237 every 30  $\mu\text{m}$ . Consistent with the improvement of spike SBR observed under the targeted  
238 illumination condition, spike-spike correlation was slightly greater under targeted illumination  
239 than widefield illumination condition across neuron pairs within 180  $\mu\text{m}$ , although no difference  
240 was observed for neuron pairs over 180  $\mu\text{m}$  (Fig. 3d). When we examined Vm-Vm correlation, we  
241 found no difference between targeted illumination and widefield illumination conditions for  
242 neurons pairs within 120  $\mu\text{m}$ , though a slightly smaller correlation value was obtained under  
243 targeted illumination for neurons over 120  $\mu\text{m}$  away (Fig. 3c). The similar Vm-Vm correlations  
244 under widefield and targeted illumination is consistent with our numerical models when the  
245 sample is only a monolayer of cells absent of significant contributions from axial tissue scattering  
246 (Fig. S2).

247



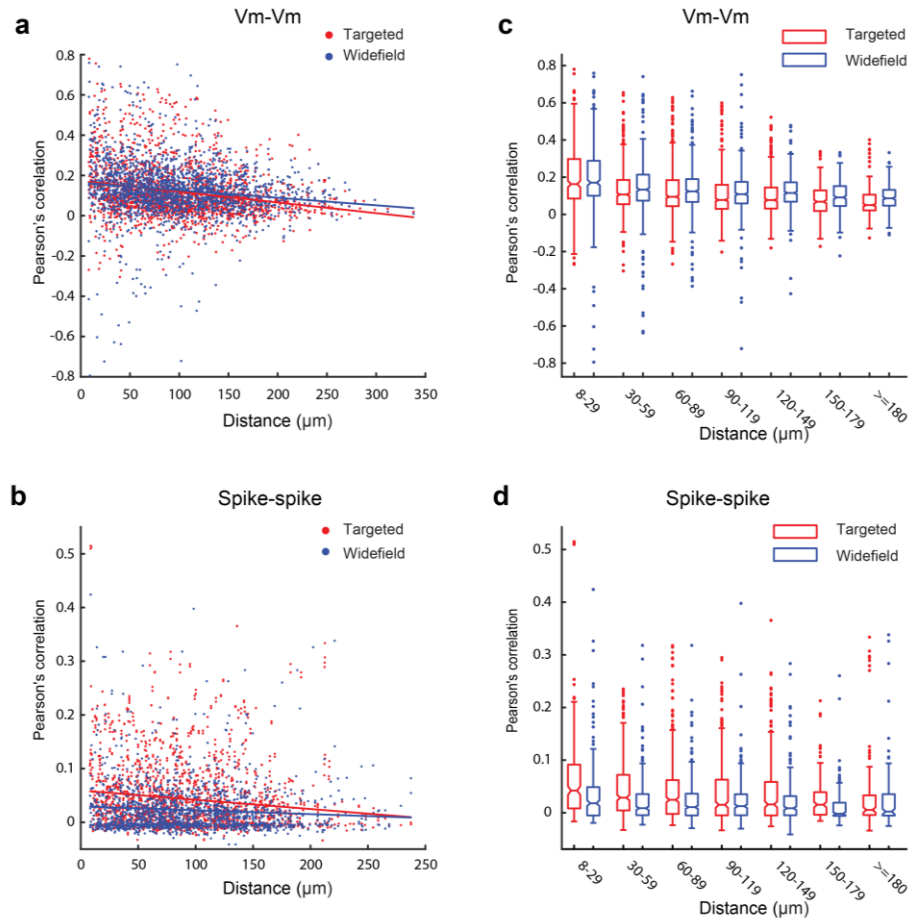

248

249 **Figure 3. Targeted illumination effects on Vm-Vm correlation and spike-spike correlation in**  
250 **cultured neurons. (a,b)** Pearson's correlation between pairs of simultaneously recorded neurons  
251 **decreased over anatomical distance for Vm-Vm correlation (a) and spike-spike correlation (b).** Red  
252 **dots indicate correlation values from pairs of neurons recorded under the targeted illumination**  
253 **condition. Blue dots indicate correlation values from pairs of neurons recorded under the widefield**  
254 **illumination condition. (c,d)** Vm-Vm correlation (c) and spike-spike correlation (d) at different  
255 **distances with 30 μm increment. Red boxplots are correlation values obtained with the targeted**  
256 **illumination condition, and blue boxplots are with the widefield illumination condition. For all**  
257 **boxplots, the box indicates the median (middle line), 25th (Q1, bottom line), 75th (Q3, top line)**  
258 **percentiles, and the whiskers are  $Q1 - 1.5 * (Q3 - Q1)$ , and  $Q3 + 1.5 * (Q3 - Q1)$ . Outliers that exceed**  
259 **these values are shown as dots. Refer to Tables S1 and S2 for statistical tests.**

260

261 Targeted illumination improves SomArchon spike SBR, reduces fluorescence crosstalk, and enables  
262 long-duration recording in the visual cortex of awake mice

263 To quantify the effect of targeted illumination in the brains of awake animals, we examined  
264 SomArchon expressing neurons in the superficial layers of visual cortex. Mice were head-fixed and  
265 free of voluntary locomotion on a spherical treadmill. For each FOV, we alternated 10-second long  
266 voltage imaging sessions between targeted illumination and widefield illumination conditions. We

267 found that targeted illumination significantly reduced SomArchon fluorescence decayed to  $11.02$   
 268  $\pm 3.08\%$  over 10 seconds, approximate half of that observed with widefield illumination ( $20.38 \pm$   
 269  $3.05\%$ ,  $p = 4.74 \times 10^{-14}$ , paired t-test,  $df = 20$ , Fig. 4k). Targeted illumination also resulted in a significant  
 270 increase in SomArchon spike SBR, achieving  $4.6 \pm 0.7$ , significantly higher than the  $4.1 \pm 0.44$   
 271 obtained with widefield illumination ( $p = 0.023$ , paired t-test,  $df = 18$  neurons, Fig. 4l), similar to  
 272 that observed in cultured neurons (Fig. 2h). This significant increase in spike SBR for the targeted  
 273 illumination condition accordingly led to a greater number of spikes identified when spike SBR  
 274 threshold is used for spike identification (Fig. 4m).  
 275

276 To examine how targeted illumination impacts correlation measurements between  
 277 simultaneously recorded neuron pairs, we computed spike-spike and Vm-Vm correlations as  
 278 detailed above in cultured neuron experiments. Unlike in cultured neurons, here due to tissue  
 279 scattering and fluorescence from out-of-focus neurons, we observed that targeted illumination  
 280 significantly reduced Vm-Vm correlation values (Fig. 4n). However, spike-spike correlation values  
 281 remained largely similar under both conditions (Fig. 4o). Since spikes are only produced when Vm  
 282 depolarization reaches sodium channel activation threshold for action potential generation, joint  
 283 synaptic inputs that produce correlative low amplitude Vm changes between neuron pairs that  
 284 are subthreshold will not be captured by spike-spike correlation measures. The fact that Vm-Vm  
 285 correlation is reduced by targeted illumination highlights that Vm signals contain a higher  
 286 proportion of background signal crosstalk than spiking signals.  
 287

287

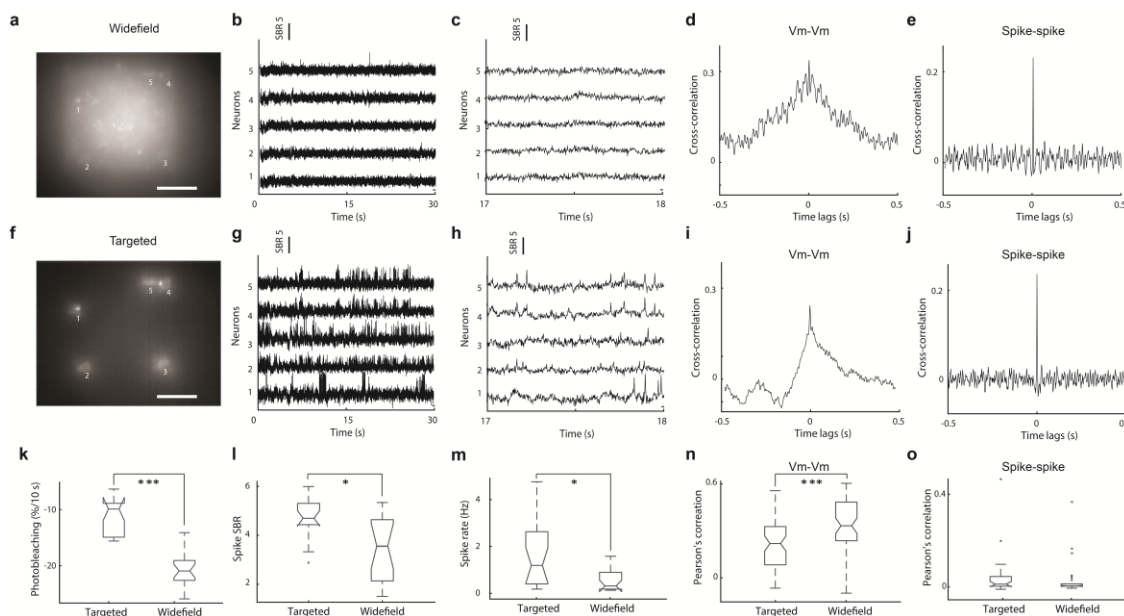

288

289 **Figure 4: Targeted illumination improves SomArchon voltage imaging performance.** (a-e)  
 290 SomArchon fluorescence voltage imaging under widefield illumination condition. (a) An example  
 291 FOV showing SomArchon fluorescence intensity averaged over the recording session. Scale bar: 50  
 292  $\mu\text{m}$ . (b,c) Example SomArchon fluorescence traces (b), and zoomed in view (c), from simultaneously  
 293 recorded 5 neurons indicated in (a) over a 10 s long recording period. (d,e) Example Vm-Vm (d)  
 294 and spike-spike correlation. (e) Cross-correlogram of a single neuron pair, neurons labeled 2 and  
 295 3 in (a). (f-j) SomArchon fluorescence voltage imaging under targeted illumination condition. (g-j)  
 296 Same plots and calculation as in (b-e), but for targeted illumination condition. (k) Fluorescence

297 decay over 10 seconds for widefield vs targeted illumination conditions (\*\*\*,  $p = 4.74e^{14}$ , paired t-  
298 test,  $df = 20$ ). (l) Spike SBR for widefield vs targeted illumination conditions (\*,  $p = 0.023$ , paired t-  
299 test,  $df = 18$ ). (m) Detected spike rates (\*,  $p = 0.016$ , paired t-test,  $df = 18$ ). (n) Vm-Vm correlations  
300 between simultaneously recorded neuron pairs with targeted illumination versus widefield  
301 illumination (\*\*\*,  $p = 0.00027$ , paired t-test,  $df = 30$ ). (o) Spike-spike correlation between  
302 simultaneously recorded neuron pairs with targeted illumination versus widefield illumination ( $p$   
303 = 0.58, paired t-test,  $df = 30$ ). The illumination power density was  $\sim 3 \text{ W/mm}^2$  for both the target  
304 illumination and the widefield illumination conditions, for this and all other visual cortex  
305 recordings. For all boxplots, the box indicates the median (middle line), 25th (Q1, bottom line),  
306 75th (Q3, top line) percentiles, and the whiskers are  $Q1-1.5*(Q3-Q1)$ , and  $Q3+1.5*(Q3-Q1)$ .  
307 Outliers that exceed these values are shown as dots.

308

309 With targeted illumination, the drastically reduced background fluorescence and consequently  
310 enhanced spike SBR allowed us to reduce illumination intensity during voltage imaging. This  
311 reduction of overall ballistic illumination intensity, and the minimization of ROI exposure to  
312 backscattered light, can help reduce SomArchon photobleaching and thus allowed for recording  
313 over an extended duration under targeted illumination. In one example, we continuously  
314 recorded from the same neurons over 5 minutes, and detected excellent spike SBRs throughout  
315 the entire recording duration (Fig. 5). Of the two simultaneously recorded neurons, the spike SBR  
316 for neuron 1 was  $4.13 \pm 1.1$  (mean  $\pm$  standard deviation,  $n = 1366$  spikes), and for neuron 2 was  
317  $4.81 \pm 1.29$  (mean  $\pm$  standard deviation,  $n = 261$  spikes). However, we did notice a reduction in  
318 spike SBR over time ( $p = 9e^{-14}$ , Kruskal-wallis,  $df = 1626$  spikes, from 2 neurons combined), which  
319 reflects the effect of fluorescence photobleaching.

320

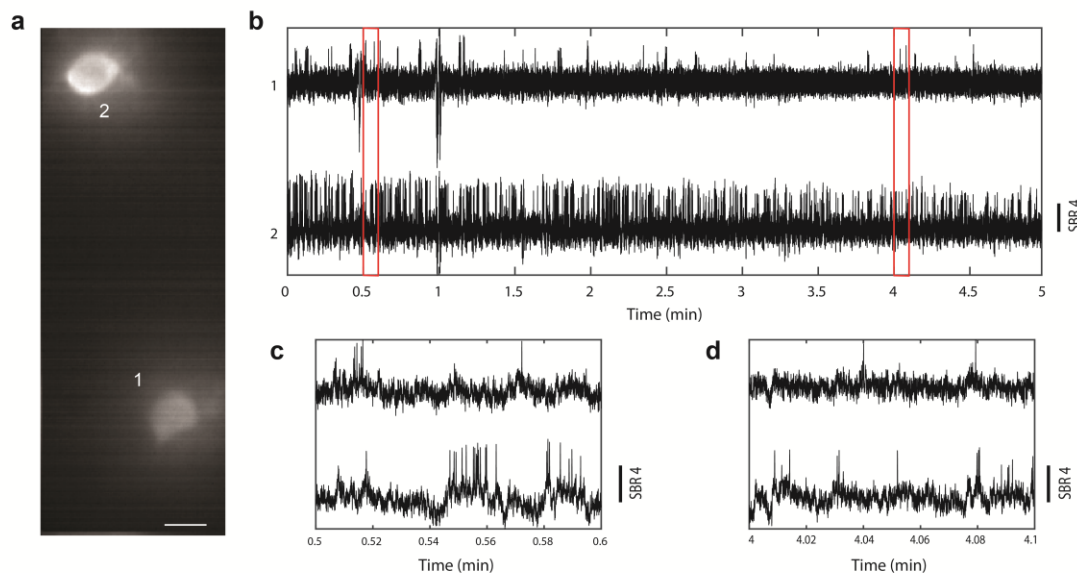

321

322 **Figure 5: An example 5-minute long continuous recording session from two visual cortex**  
323 **neurons. (a) SomArchon fluorescence image from two neurons visualized with targeted**  
324 **illumination. Scale bar, 10  $\mu\text{m}$ . (b) SomArchon fluorescence traces throughout the entire 5-minute**

325 *long recording session. (c,d) Zoom-in view of SomArchon fluorescence towards the beginning (c)*  
326 *and the end of the recording session (d).*

327

328 Targeted illumination allows for large scale recordings in CA1 of awake mice

329 Having established the significant advantage of targeted illumination, we deployed targeted  
330 illumination to image multiple neurons in the dorsal hippocampus CA1 region. Combining  
331 targeted illumination with a high-speed large sensor sCMOS camera, we can simultaneously  
332 image tens of neurons with a FOV of  $360 \times 180 \mu\text{m}^2$ . We performed 6 recordings of 17 or more  
333 CA1 neurons ( $37 \pm 22$  neurons per session, mean  $\pm$  standard deviation), while mice were awake  
334 and head-fixed navigating the spherical treadmill. Across these recording sessions, we recorded a  
335 total of 222 spiking neurons, with a spike SBR of  $4.16 \pm 0.5$  (mean  $\pm$  standard deviation,  $n = 222$   
336 spiking neurons, Fig. 6, Fig. S5). In one recording, we were able to record 76 neurons  
337 simultaneously, and detected spikes in 58 of those neurons, over a 90-second long recording  
338 period (Fig. 6). The mean spike SBR of these neurons was  $3.94 \pm 0.4$  (mean  $\pm$  standard deviation,  
339  $n = 58$  neurons).

340

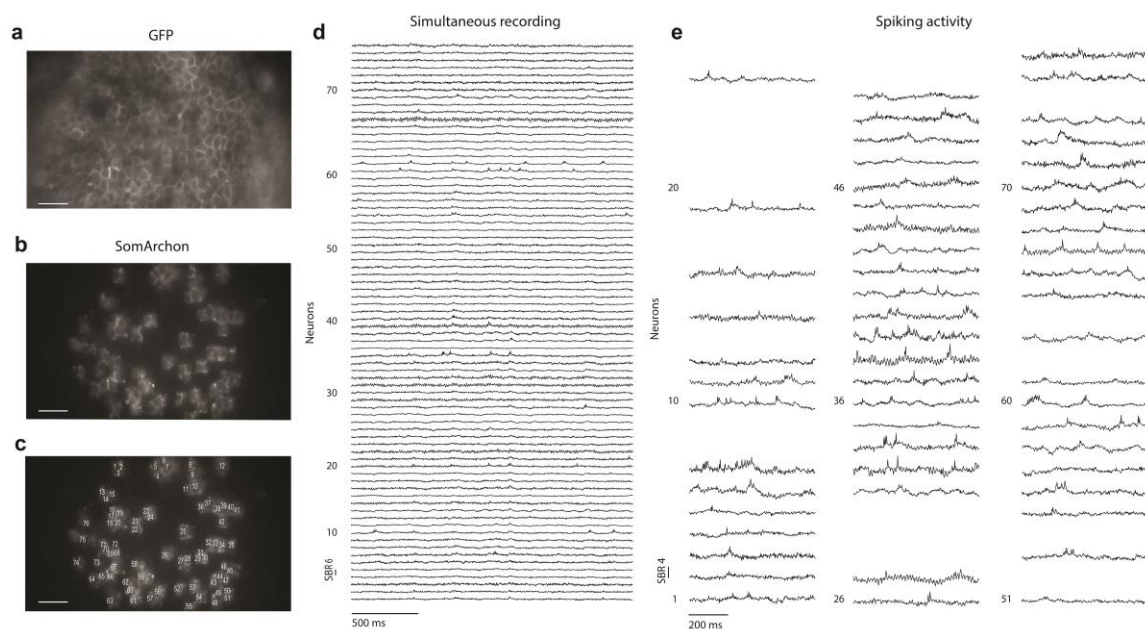

341

342 **Figure 6: An example of 90-second long continuous recording from 76 CA1 neurons**  
343 **simultaneously using targeted illumination in a behaving mouse. (a-c) SomArchon expressing**  
344 **CA1 neurons in the FOV, visualized via GFP fluorescence (a), SomArchon fluorescence visualized**  
345 **with targeted illumination (b), and with each neuron labelled (c). Scale bar, 50  $\mu\text{m}$ . (d) Example**  
346 **traces of simultaneously recorded 76 CA1 neurons. 2.5 seconds recordings are shown here. (e)**  
347 **Representative example spikes in the 58 neurons where spikes were detected. The illumination**  
348 **power density was  $4\text{-}5\text{W}/\text{mm}^2$  for this and all other CA1 recordings.**

349

350 Further quantification of Vm-Vm and spike-spike correlation over anatomical distance between  
351 simultaneously recorded CA1 neuron pairs revealed that both Vm-Vm and spike-spike  
352 correlations substantially decreased with anatomical distance (Fig. 7, *Kruskal-wallis*,  $p = 5.16e^{-7}$ ,  
353  $df = 5109$  for Vm-Vm correlations;  $p = 3.18e^{-6}$ ,  $df = 4771$  for spike-spike correlations). These results  
354 are consistent with that observed in cultured neurons and reflect the general understanding that  
355 nearby neurons tend to receive more temporally aligned synaptic inputs relative to neurons  
356 further apart<sup>25</sup>.

357

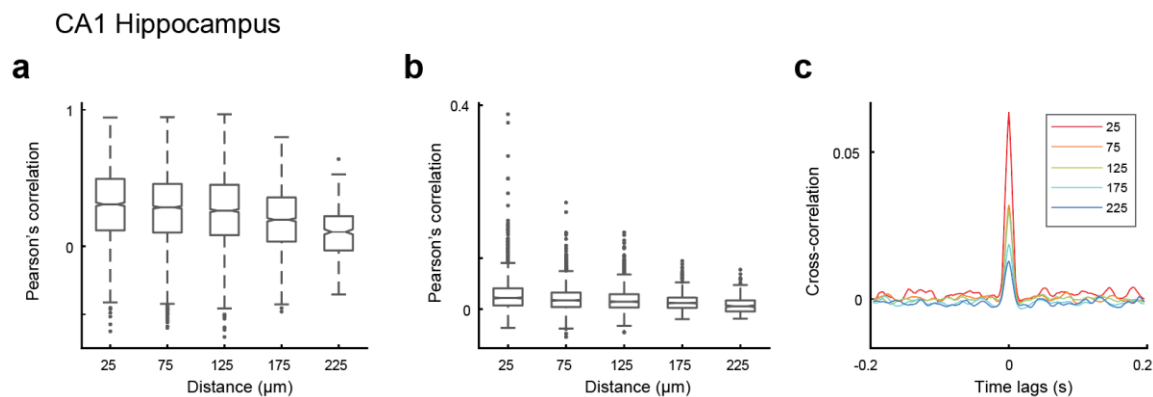

358

359 **Figure 7:** Pearson's correlation values of spike-spike and Vm-Vm correlation over anatomical  
360 distance. (a) Vm-Vm correlation of CA1 neuron pairs over distance. Correlation values are grouped  
361 by distance (0 - 50  $\mu\text{m}$ , 51 - 100  $\mu\text{m}$ , 101- 150  $\mu\text{m}$ , 151 - 200  $\mu\text{m}$ , 201 - 250  $\mu\text{m}$ ). (b) Spike-spike  
362 correlation of CA1 neurons over distance. (c) Average spike-spike cross-correlogram across all  
363 recorded neuron pairs. For all boxplots, the box indicates the median (middle line), 25th (Q1,  
364 bottom line), 75th (Q3, top line) percentiles, and the whiskers are  $Q1-1.5*(Q3-Q1)$ , and  
365  $Q3+1.5*(Q3-Q1)$ . Outliers that exceed these values are shown as dots.

366

## 367 Discussion

368 Widefield microscopy remains an essential imaging technique for high-speed voltage imaging,  
369 especially in task performing animals where a large FOV with high spatial resolution is required to  
370 resolve the activity from many individual neurons simultaneously. To improve epi-fluorescence  
371 microscopy for high speed, large scale, and long duration voltage imaging, we developed a simple,  
372 low cost, DMD-based targeted illumination system that can be easily integrated into a custom  
373 widefield microscope. We estimated the impact of background fluorescence on voltage imaging  
374 theoretically, and then experimentally quantified the improvement of targeted illumination for  
375 SomArchon voltage imaging performance in 2D neuron cultures and in the brains of behaving  
376 mice. We found that by restricting illumination to neuronal cell bodies, we were able to  
377 significantly increase SomArchon signal quality in terms of spike SBR and reduce out-of-focus  
378 background fluorescence. These improvements were more substantial for *in vivo* brain imaging  
379 than in cultured neurons, and were consistently observed across the two brain regions tested that  
380 have varying labeling density, including the visual cortex with sparsely-labeled neurons and the  
381 hippocampus with densely labeled neurons. With such improvements in SomArchon signal  
382 quality, together with a high-speed large sensor size sCOMS camera, we were able to record

383 optical voltage signals from over 70 neurons simultaneously over a wide FOV of  $360 \times 180 \mu\text{m}^2$  at  
384 500 Hz.

385

386 One advantage of using targeted illumination is the reduced power density of excitation light,  
387 from both direct ballistic excitation photons and backscattered photons from tissue scattering. In  
388 this study, the ballistic excitation power density used for *in vivo* recordings was measured at 3 –  
389 5 W/mm<sup>2</sup>, which equals to 0.7 – 1.1 mW per neuron (assuming a  $15 \times 15 \mu\text{m}^2$  square excitation  
390 region). However, for *in vivo* imaging, the actual excitation power will be further affected by tissue  
391 scattering. Photons targeting a cell can be scattered away from the ROI, whereas photons  
392 targeting non-ROI regions could eventually reach an ROI due to forward and backward scattering.  
393 Therefore, although the same excitation power density was applied to both targeted illumination  
394 and widefield illumination conditions, neurons under widefield illumination conditions were  
395 actually exposed to higher excitation, causing the greater observed fluorescence decay, due to  
396 enhanced photobleaching of SomArchon. In addition, the improved spike SBR also allowed us to  
397 reduce ballistic excitation power for targeted illumination. As a result, we were able to perform  
398 continuous recordings over many minutes in duration, with only moderate reductions in spike  
399 SBR. While the performance of fluorescence based activity indicators are always limited by  
400 photobleaching, deploying trial-based study designs without excitation illumination during inter-  
401 trial-intervals should allow SomArchon to measure membrane voltage over many trials, and  
402 potentially over a greater cumulative period of time than demonstrated here using continuous  
403 illumination.

404

405 To estimate SomArchon fluorescence quality, we calculated spike to baseline ratio (SBR). The  
406 baseline used in this SBR calculation contains both biological subthreshold membrane voltage  
407 fluctuations and SomArchon intrinsic fluorescent shot noise. While artificially setting neuronal  
408 voltage below action potential threshold, as often practiced in voltage clamp experiments, helps  
409 minimize the impact of synaptic potentials during non-spiking period to allow for estimation of  
410 the fluorescence sensor shot noise, it is not meaningful in the context of *in vivo* experiments.  
411 Neurons in intact neural circuits, especially in the awake brain, receive heterogenous synaptic  
412 inputs and exhibit distinct membrane biophysical properties, which lead to variation in  
413 subthreshold membrane voltage fluctuations that are difficult to estimate. Thus, spike SBR  
414 estimation for each neuron cannot fully capture the quality of SomArchon signal contrasts, and  
415 represents an underestimation of SomArchon performance. However, spike SBRs of the same  
416 neuron when compared under the two illumination conditions can provide a quantitative  
417 measure of the fluorescence signal quality, providing direct experimental evidence that targeted  
418 illumination significantly improve fluorescence quality of SomArchon voltage imaging. Since spike  
419 SBR is a key consideration for spike detection, the fact that we detected more spikes under  
420 targeted illumination condition further demonstrates the improvement of SomArchon voltage  
421 signal quality.

422

423 Compared to other systems, such as the spatial light modulator-based holographic targeting  
424 technique<sup>6</sup>, which provides similar benefit of reduced background and enhanced SBR, our DMD-

425 based targeted illumination system is more cost-effective, much simpler to implement, and covers  
426 a much larger FOV. Although two-photon microscopy offers inherent background rejection<sup>26</sup>, the  
427 requirement for high acquisition speed has not made it conducive to voltage imaging with a few  
428 notable exceptions<sup>4,19,27,28</sup>, all of which involve significant technical challenges in terms of the  
429 optical setup. More importantly, these demonstrations have also been limited to simultaneous  
430 imaging of a few neurons for several seconds in duration.

431

432 A further consideration is that imaging living animals will always be subject to fine movement due  
433 to metabolic, physiologic, and vascular changes, which can be corrected via image registration<sup>29,30</sup>.  
434 Targeting illumination only to cell membranes using holographic projections is sensitive to  
435 translational movement due to restricted area of illumination, which may make it difficult to  
436 deploy during behavior in animals. In contrast, DMD-based targeting has the flexibility to adjust  
437 the illumination window size to accommodate fine biological motion during awake and behaving  
438 conditions. For example, increasing the region of targeted illumination to capture the  
439 morphological details of a neuron allows for fine translational movement that can be effectively  
440 corrected after image acquisition. Single photon widefield imaging is also more amenable to axial  
441 motions due to the lack of optical sectioning<sup>20</sup>, which allows for continuous recording of signal  
442 during subtle fluctuations in axial positions. While such advantage is retained to some degree over  
443 the illuminated regions with DMD-based targeted illumination, it is less so when using holographic  
444 projections. Techniques with confined excitation volume limited to narrow z-axis profiles, such as  
445 two-photon microscopy<sup>26</sup>, are much more sensitive to image motion expected from behaving  
446 animals<sup>31</sup>.

447

448 Combining DMD-based targeted illumination with the fully genetically encoded SomArchon and  
449 a high-speed large area sCMOS camera, we were able to record dozens of neurons concurrently,  
450 over extended periods of time. The capability of sampling both subthreshold voltage fluctuations  
451 and action potentials from a large number of neurons will enable new experimental designs that  
452 are otherwise not feasible with lower throughput intracellular voltage measurement techniques,  
453 such as patch-clamp or sharp electrode recording approaches. With continued improvement of  
454 GEVIs, simple optical voltage imaging instrumentation as presented here can be easily adopted  
455 across a broad number of neuroscience studies.

456

#### 457 **Acknowledgements**

458 We thank members of the Han Lab for technical support.

#### 459 **Author Contributions**

460 S.X., E.L., H.J.G, and J.S. performed all experiments. S.X. produced the simulated data model.  
461 E.L., P.F., and Y.W. analyzed the data. R.M. provided surgical expertise and H.T. consulted on  
462 imaging data analysis. H.M. provided *in vitro* resources and J.M. consulted on imaging system

463 design. X.H. supervised the study. S.X, E.L., H.J.G, and X.H. wrote the manuscript. All authors  
464 edited the manuscript.

465

466 **Declaration of Interests**

467 The authors declare no competing interests.

468

469 **Financial Disclosure**

470 X.H. acknowledges funding from NIH (1R01MH122971, 1R01NS115797, R01NS109794,  
471 1R34NS111742), NSF (CBET-1848029, DIOS-2002971). J.M. and X.H. acknowledges funding from  
472 NIH (RO1EB029171), and E.L. acknowledges funding from Boston University Center for Systems  
473 Neuroscience. J.S. is supported by a training grant from the NIH/NIGMS (5T32GM008541-23). The  
474 funders had no role in study design, data collection and analysis, decision to publish, or  
475 preparation of the manuscript.

476



477 **Methods**

478 **Simulated data theory for widefield fluorescence imaging**

479 We consider the problem of widefield fluorescent imaging in a mouse brain in the context of  
 480 imaging through scattering media within the forward scattering limit. In our model (Fig. S1), an  
 481 incoherent source located at plane  $z = 0$  is embedded at depth  $z = z_t$  inside a scattering  
 482 medium, whose scattering properties are characterized by the scattering phase function  $p(\hat{\mathbf{s}})$ ,  
 483 mean scattering length  $l_s$ , and anisotropic factor  $g \approx 1$ . The image of the scattered light field  
 484 from the source is relayed by a unit magnification  $4f$  system and recorded by a detector that's  
 485 conjugate to the plane  $z = z_s$  in the sample space. Within the scattering medium, light  
 486 propagation can be characterized in terms of radiance  $\mathcal{R}(z, \boldsymbol{\rho}, \hat{\mathbf{s}})$  using a simplified radiative  
 487 transport equation by invoking small angle approximation<sup>24</sup>:

$$\frac{\partial}{\partial z} \mathcal{R}(z, \boldsymbol{\rho}, \hat{\mathbf{s}}) + \hat{\mathbf{s}} \cdot \nabla \mathcal{R}(z, \boldsymbol{\rho}, \hat{\mathbf{s}}) = -\frac{1}{l_s} \mathcal{R}(z, \boldsymbol{\rho}, \hat{\mathbf{s}}) + \frac{1}{4\pi l_s} \int p(\hat{\mathbf{s}} - \hat{\mathbf{s}}') \mathcal{R}(z, \boldsymbol{\rho}, \hat{\mathbf{s}}') d^2 \hat{\mathbf{s}}' \quad (1)$$

488 where  $(\boldsymbol{\rho}, z) = (x, y, z)$  is the 3D position vector,  $\hat{\mathbf{s}} = (\theta_x, \theta_y, 0)$  is a unit direction vector  
 489 parameterized by the two angles assumed to be small, where  $\theta_{x,y} \approx 0$ .

490 To solve Eq. (1), it is necessary to establish a boundary condition, which, in our case, can be  
 491 expressed as an isotropic emitter with intensity distribution  $I_0(\boldsymbol{\rho}_0)$  located at axial position  $z_0 =$   
 492 0

$$J_0(\boldsymbol{\rho}_c, \boldsymbol{\rho}_d, z_0) = \frac{1}{\kappa^2} I_0(\boldsymbol{\rho}_c) \delta(\boldsymbol{\rho}_d) \quad (2)$$

493 where  $\kappa = n/\lambda$ ,  $n$  is the refractive index,  $\lambda$  is the wavelength. Note that here we expressed the  
 494 boundary condition in terms of mutual coherence function  $J(\boldsymbol{\rho}_c, \boldsymbol{\rho}_d, z) = \langle E(\boldsymbol{\rho}_+, z) E^*(\boldsymbol{\rho}_-, z) \rangle$ ,  
 495 where  $\boldsymbol{\rho}_{\pm} = \boldsymbol{\rho}_c \pm \boldsymbol{\rho}_d/2$ , instead of radiance  $\mathcal{R}(z, \boldsymbol{\rho}, \hat{\mathbf{s}})$ . This is because for an imaging system, we  
 496 are more interested in the propagation of mutual coherence since it characterizes correlations of  
 497 light fields between pairs of points that contribute to the final fluorescence intensity. This  
 498 quantity, under paraxial limit, is related to the radiance of light field as

$$J(\boldsymbol{\rho}_c, \boldsymbol{\rho}_d, z) = \int \mathcal{R}(z, \boldsymbol{\rho}_c, \hat{\mathbf{s}}) e^{i2\pi\kappa\hat{\mathbf{s}} \cdot \boldsymbol{\rho}_d} d^2 \hat{\mathbf{s}} \quad (3)$$

499 Eq. (1) together with the boundary condition Eq. (2) can be solved analytically using double  
 500 Fourier transform<sup>24</sup>. We can therefore find the mutual coherence function at the surface of the  
 501 scattering medium  $z = z_t$  as

$$J_0(\boldsymbol{\rho}_{0c}, \boldsymbol{\rho}_{0d}, z_t) = \frac{e^{-H(z_t, \boldsymbol{\rho}_{0d})}}{z_t^2} \int I_0(\boldsymbol{\rho}_0) e^{-i2\pi\frac{\kappa}{z_t}(\boldsymbol{\rho}_0 - \boldsymbol{\rho}_{0c}) \cdot \boldsymbol{\rho}_{0d}} d^2 \boldsymbol{\rho}_0 \quad (4)$$

502 where  $H(z, \boldsymbol{\rho}) = \frac{1}{l_s} \int_0^z \left[ 1 - \frac{1}{4\pi} P(\kappa \boldsymbol{\rho} z' / z) \right] dz'$ , and  $P(\boldsymbol{q}) = \int p(\boldsymbol{s}) e^{i2\pi \boldsymbol{s} \cdot \boldsymbol{q}} d\boldsymbol{s}$  is the Fourier  
 503 transform of the scattering phase function. This light field can be further propagated through a  
 504  $4f$  imaging system, resulting in the measured intensity at the detector plane as

$$I_d(\boldsymbol{\rho}_{1c}, z_s, z_t) = \iint \text{CSF}\left(\boldsymbol{\rho}_{1c} - \boldsymbol{\rho}_{0c} - \frac{1}{2}\boldsymbol{\rho}_{0d}, z_s - z_t\right) \text{CSF}^*\left(\boldsymbol{\rho}_{1c} - \boldsymbol{\rho}_{0c} + \frac{1}{2}\boldsymbol{\rho}_{0d}, z_s - z_t\right) J_0(\boldsymbol{\rho}_{0c}, \boldsymbol{\rho}_{0d}, z_t) d^2\boldsymbol{\rho}_{0c} d^2\boldsymbol{\rho}_{0d} \quad (5)$$

505 where  $\text{CSF}(\boldsymbol{\rho}, z) = e^{i2\pi\boldsymbol{\rho}\cdot\boldsymbol{\kappa}_\perp} \int \text{CTF}(\boldsymbol{\kappa}_\perp) e^{i2\pi\boldsymbol{\rho}\cdot\boldsymbol{\kappa}_\perp - i\pi\frac{z}{\kappa}\kappa_\perp^2} d^2\boldsymbol{\kappa}_\perp$  is the 3D coherent spread function,  
 506  $\text{CTF}(\boldsymbol{\kappa}_\perp) = A\left(\frac{f_0}{\kappa}\boldsymbol{\kappa}_\perp\right)$  is the in-focus coherent transfer function,  $A(\boldsymbol{\xi})$  is the microscope aperture,  
 507 and  $f_0$  is the focal length of the imaging lenses<sup>18</sup>. Note that here we assumed unit magnification  
 508 and refractive index of the medium  $n = 1$ .

509 From Eq. (4) and Eq. (5), using the definition of optical transfer function we therefore have the 3D  
 510 scattering optical transfer function (SOTF) for imaging a fluorescent object embedded in  
 511 scattering media as:

$$\text{SOTF}(\boldsymbol{\kappa}_d, z_s, z_t) = \frac{e^{-H\left(z_t, \frac{\boldsymbol{\kappa}_d}{\kappa} z_t\right)}}{\kappa^2} \int \text{CTF}\left(\boldsymbol{\kappa}_c + \frac{1}{2}\boldsymbol{\kappa}_d\right) \text{CTF}^*\left(\boldsymbol{\kappa}_c - \frac{1}{2}\boldsymbol{\kappa}_d\right) e^{-i2\pi\frac{z_s}{\kappa}\boldsymbol{\kappa}_c\cdot\boldsymbol{\kappa}_d} d^2\boldsymbol{\kappa}_c \quad (6)$$

512 Eq. (6) is the main results that we use for simulating widefield neuronal imaging, the  
 513 interpretation of which is that the propagation of mutual coherence can be simply considered as  
 514 free space propagation with an additional attenuation factor  $e^{-H\left(z_t, \frac{\boldsymbol{\kappa}_d}{\kappa} z_t\right)}$  due to scattering. Note  
 515 that this result not only holds for imaging of fluorescent signals in the detection path, but can also  
 516 be applied to delivering illumination patterns onto a scattering sample in the excitation path (i.e.,  
 517 targeted illumination).

518 Biological tissues such as the brain are typically characterized by strong forward scattering where  
 519  $g \approx 1$ , where the distribution of scattering angles follows the Henyey-Greenstein phase  
 520 function<sup>32</sup>:

$$p(\hat{\boldsymbol{s}} - \hat{\boldsymbol{s}}') = p(\Delta\boldsymbol{s}) = \frac{1 - g^2}{[(1 - g)^2 + g\Delta\boldsymbol{s}^2]^{3/2}} \quad (7)$$

521 Assuming a circular microscope aperture of radius  $r$ , substituting Eq. (7) into Eq. (6) and using the  
 522 Stokseth approximation of free space 3D optical transfer function (OTF)<sup>33</sup>, we arrive at the  
 523 analytical solution of the 3D SOTF:

$$\text{SOTF}(\boldsymbol{\kappa}_\perp, z_s, z_t) = e^{-H\left(z_t, \frac{\boldsymbol{\kappa}_\perp}{\kappa} z_t\right)} \text{OTF}(\boldsymbol{\kappa}_\perp) \text{jinc}\left[\pi z_s \Delta\kappa_\perp \frac{\boldsymbol{\kappa}_\perp}{\kappa} \left(1 - \frac{\boldsymbol{\kappa}_\perp}{\Delta\kappa_\perp}\right)\right] \quad (8)$$

524 where  $\Delta\kappa_\perp = 2NA/\lambda$ ,  $NA = r/f_0$  is the numerical aperture of the system, and

$$\text{OTF}(\boldsymbol{\kappa}_\perp) = \frac{2}{\pi} \left[ \cos^{-1}\left(\frac{\boldsymbol{\kappa}_\perp}{\Delta\kappa_\perp}\right) - \frac{\boldsymbol{\kappa}_\perp}{\Delta\kappa_\perp} \sqrt{1 - \left(\frac{\boldsymbol{\kappa}_\perp}{\Delta\kappa_\perp}\right)^2} \right] \quad (9)$$

525 is the in-focus free space OTF. With Eq. (8), we can calculate the detected image or projected  
 526 pattern simply by filtering the original object/pattern in frequency space using the corresponding  
 527 SOTF.

528 **Simulation of widefield illumination versus targeted illumination conditions**

529 Using the theoretical model developed above, we compared the background fluorescence signals  
530 generated using widefield and targeted illumination. We estimated the reduction of background  
531 fluorescent signals from non-targeted SomArchon expressing neurons, or in other words, signal  
532 cross-contamination, with the use of targeted illumination compared to standard widefield  
533 illumination. For simplicity, here we only modeled a pair of neurons that are separated by a  
534 distance  $D_x$  laterally and  $D_z$  axially (Fig. S2 and Fig. S3). Each neuron was assumed to be a 15  $\mu\text{m}$   
535 diameter uniformly fluorescent sphere. For widefield illumination, the entire FOV was illuminated  
536 equally. For targeted illumination, only a 15  $\mu\text{m}$  circular ROI was projected onto the sample  
537 centered at the location of the neuron of interest. Although both neurons were imaged onto the  
538 camera, only the targeted one contained the signal, and the contribution from the other non-  
539 targeted neuron within the ROI of the targeted neuron (the red circle in Fig. S2 d-i and Fig. S3 c-  
540 h) was considered as background (or crosstalk).

541 In the simulation, we assumed the imaging system has unit magnification and  $NA = 0.4$ . The  
542 excitation and emission wavelength are  $\lambda_{ex} = 637 \text{ nm}$ ,  $\lambda_{em} = 670 \text{ nm}$  respectively, with  
543 corresponding tissue anisotropic factor  $g_{637\text{nm}} = 0.89$ ,  $g_{670\text{nm}} = 0.90$ , and mean scattering  
544 length  $l_{s,637\text{nm}} = 110 \mu\text{m}$ ,  $l_{s,670\text{nm}} = 119 \mu\text{m}$ <sup>34</sup>. Two different scenarios for optical voltage  
545 imaging were considered, namely *in vitro* imaging in 2D neuronal cell culture and *in vivo* imaging  
546 in a mouse brain.

547 For *in vitro* imaging in cultured neurons, since it typically consists of a monolayer of cells, we  
548 therefore assumed the two neurons are at the same depth  $z_t = 0$  (Fig. S2 a,b) with no tissue  
549 scattering. By varying lateral distance  $D_x$ , we plotted the amount of crosstalk induced by the non-  
550 targeted neurons in Fig. S2 c. Both widefield illumination and targeted illumination introduce  
551 similar amount of crosstalk, as confirmed by our *in vitro* imaging experiments. Note that in reality,  
552 these two neurons should not overlap in space and should have a separation at least  $D_x = 15 \mu\text{m}$   
553 (although  $D_x < 15 \mu\text{m}$  is still plotted for completeness), in which case the amount of crosstalk is  
554 close to 0. Therefore, we expect very little benefit of using targeted illumination for reducing  
555 crosstalk in *in vitro* imaging. However, targeted illumination still pertains certain advantages over  
556 widefield illumination in terms of photobleaching and SBR because of the reduction of stray light  
557 and non-specific background signals.

558 For *in vivo* imaging in a mouse brain, we assumed that the targeted neuron was located at depth  
559  $z_t = 100 \mu\text{m}$  (see Fig. S3 a,b) inside the tissue with scattering properties given above. The amount  
560 of crosstalk at positions with varying  $D_x$  and  $D_z$  are plotted in Fig. 1c. In this case, targeted  
561 illumination results in much higher reductions in crosstalk, with most significant effects when out-  
562 of-focus ( $D_z \neq 0$ ). Example images of the non-targeted neuron at a defocus distance  $D_z = 15 \mu\text{m}$   
563 with varying lateral displacement  $D_x = 0 \mu\text{m}$ ,  $10 \mu\text{m}$ ,  $20 \mu\text{m}$  are given in Fig. S3 c-h, where one  
564 can see much lower intensity from the non-targeted neuron, with the crosstalk under targeted  
565 illumination only at 76%, 44% and 3.8% of the values under widefield illumination.

566 Note that here our simulation only considers a pair of neurons, so the induced crosstalk values  
567 are relatively low. For *in vivo* imaging where a much higher number of neurons are labeled, the  
568 signal cross-contaminations can be introduced by tens or hundreds of neurons collectively. In this  
569 case, the background with widefield illumination would be more detrimental as to render the in-

570 focus neuron visually indiscernible (see Fig. 1d-g), which could further necessitate the use of  
571 targeted illumination.

#### 572 **Cell cultures:**

573 Rat cortical neuron cultures were dissociated from E18 rat embryos (Charles River) and plated on  
574 coverslips coated with poly-D lysine (Millipore Sigma cat # P2636) at 0.1 mg/mL in 0.1M borate  
575 buffer (pH 8.5), and bathed with plating medium containing DMEM/F12 (Gibco cat. # 21331020)  
576 supplemented with 10% Heat Inactivated FBS (R&D systems cat. # S11150), 5% Heat Inactivated  
577 Horse Serum (Thermo Fisher Scientific cat. # 26050070), 1% Penicillin/Streptomycin (Thermo  
578 Fisher Scientific cat. # 15140122), 397  $\mu$ M L-Cysteine hydrochloride (Millipore Sigma cat. #  
579 C1276), and 2 mM L-Glutamine (Thermo Fisher Scientific cat. # 35050061) (O'Connor 2020). 24  
580 hours after plating, cells were switched to a feeding medium containing NBM (Gibco cat. #  
581 21103049) supplemented with 1% Heat Inactivated Horse Serum (Thermo Fisher Scientific cat. #  
582 26050070), 2% NeuroCult SM1 supplement (Stimcell Technologies cat. # 05711), and 1.4%  
583 penicillin/streptomycin (Thermo Fisher Scientific cat. # 15140122) and 800  $\mu$ M L-Glutamine. 11  
584 days later, 5-fluoro-2-deoxyuridine (Millipore cat. # 343333) was added at a concentration of 4  
585  $\mu$ M to prevent glial cell overgrowth. 50% of the cell culture medium was exchanged every 3 days.  
586 Neurons were transduced with 0.25  $\mu$ L of AAV9-syn-SomArchon per well in 0.25 mL of feeding  
587 media, 3-4 days after plating. Cells were imaged 14-16 days after plating, in an imaging buffer  
588 containing 145 mM NaCl, 2.5 mM KCl, 10 mM glucose, 10 mM HEPES, 2 mM CaCl<sub>2</sub>, and 1 mM  
589 MgCl<sub>2</sub>, pH 7.4.

#### 590 **Animal surgical procedures**

591 All procedures involving animals were approved by the Boston University Institutional Animal  
592 Care and Use Committee (IACUC). C57BL/6 adult female mice (3-6 months old on the day of  
593 recording) were used in this study. Mice were surgically implanted with an imaging chamber and  
594 a head-plate as described previously<sup>3</sup>. AAV-syn-SomArchon was injected either through an  
595 infusion cannula attached to the window after the surgery, or injected during the surgery.

#### 596 **Custom widefield optical imaging setup**

597 We customized a dual color epi-fluorescence fluorescence microscope, which used a 470 nm LED  
598 (Thorlabs, M470L3) for GFP fluorescence excitation, and a 637 nm fiber-coupled laser (Ushio  
599 America Inc., Necsel Red-HP-FC-63x) for SomArchon fluorescence excitation. The two illumination  
600 channels were combined using a dichromatic mirror (Thorlabs, DMLP550R) and subsequently  
601 directed onto the sample. The generated fluorescent signal was epi-collected by a microscope  
602 objective (Nikon, 40 $\times$ /0.8NA CFI APO NIR) and imaged onto a camera (Hamamatsu, ORCA-  
603 Lightning C14120-20P) with a 175 mm tube lens. A combination of excitation filter, dichromatic  
604 mirror, and emission filter (Semrock, LF405/488/532/635-A-000) was used to separate  
605 fluorescent signals from the excitation light.

606 To pattern the illumination in the SomArchon imaging channel, the output of the 637 nm  
607 multimode laser was collimated (Thorlabs, F950SMA-A), expanded (Thorlabs, BE02M-A), and  
608 directed onto a DMD (Vialux, V-7000 VIS) at approximately 24° to its surface normal. The DMD  
609 was further imaged onto the sample with a 175 mm lens and the objective, so that only sample  
610 regions corresponding to the 'on' pixels of DMD were illuminated. The axial position of the DMD  
611 was adjusted so that it is conjugate to the camera, and an additional affine transform was

612 estimated to register the pixels between the DMD and the camera. The DMD was controlled using  
613 custom Matlab script based on Vialux ALP-4.2 API.

614 During each imaging session, a GFP fluorescence image was first taken for illumination target  
615 identification, where a small rectangular ROI was manually selected for each individual neuron to  
616 be imaged. A binary illumination mask was then generated based on all the selected ROIs and  
617 uploaded to the DMD for illumination targeting. SomArchon voltage imaging was performed at  
618 500 Hz, with  $2 \times 2$  pixel binning, resulting in an imaging area of  $1152 \times 576$  pixels on the sCMOS  
619 camera sensor, corresponding to a  $360 \times 180 \mu\text{m}^2$  FOV at the sample. To estimate sCMOS camera  
620 dark level and intrinsic noise, videos were collected with the camera set to the same acquisition  
621 parameters as during regular imaging experiments, but without light exposure (500 Hz,  $2 \times 2$  pixel  
622 binning,  $1152 \times 576$  pixels imaging area). The sensor dark level was estimated to be 767.7, with  
623 an intrinsic noise of 12.6 (standard deviation) per pixel.

#### 624 **Data analysis**

625 All imaging data were acquired by HImage software (Hamamatsu), and further processed using  
626 MATLAB (Mathworks) offline.

#### 627 **Neuron ROI selection**

628 All data analysis was performed offline in Matlab 2019b or 2020a. SomArchon fluorescence  
629 images were first motion corrected using a pairwise rigid motion correction algorithm as  
630 described previously<sup>29</sup>. For targeted illumination recordings, each ROI was centered on a neuron  
631 of interest, with the ROI size slightly greater than the outline of the neurons, so that motion  
632 correction can be performed on each targeted ROI that had distinguishable features identifiable  
633 by the algorithm. After motion correction, we manually selected ROIs corresponding to individual  
634 neurons, based on the average SomArchon fluorescence image during the first recorded trial. ROIs  
635 were cross-referenced by comparing SomArchon fluorescence with the stable EGFP fluorescence.  
636 The identified neurons were then applied to all subsequent trials in the same recording session.  
637 SomArchon fluorescence traces were then extracted for each neuron by averaging all the pixels  
638 within the neuron across the entire experiments. For direct comparison of SomArchon  
639 fluorescence of the same neurons between widefield and target illumination conditions, the same  
640 neuron ROIs were used for both recording conditions. Trace time segments with sharp, drastic  
641 changes in fluorescence (e.g. due to motion) were detected as outliers and excluded from further  
642 analysis in both the widefield and targeted illumination analysis. Specifically, for the outlier  
643 detection we applied the generalized extreme Studentized deviate test on the moving standard  
644 deviation values using a sliding window of  $\pm 60$  ms on spike-removed traces (see Method Section  
645 spike detection and spike SBR calculation). In some cases, not all time points during the period of  
646 an artefact were marked as outliers. Time points between outliers ( $< 3$  data points) were therefore  
647 interpolated. To remove further artefacts, we excluded time points that were 6 standard  
648 deviations outside the trace fluorescence distribution. Time points between and around the  
649 detected outliers were also removed ( $\pm 350$  ms) as those periods often coincided with extended  
650 animal motion artefacts.

#### 651 **Fluorescence decay estimation**

652 To estimate SomArchon fluorescence decay, we first removed spikes by applying a median filter  
653 (window of 51 frames), and then subtracted the camera dark level (measured as 767.7). We  
654 calculated fluorescence decay as the ratio of the mean fluorescence intensity during the first 600  
655 ms and that during the last 600 ms for each trial, and then averaged across all trials. In cultured  
656 neurons, we detected a drastic fluorescence drop within the first couple seconds of recording,  
657 likely mainly due to bleaching of autofluorescence unrelated to SomArchon, thus we excluded the  
658 first trial from subsequent analysis for culture neuron analysis.

#### 659 **Spike detection and spike SBR calculation**

660 To separate spikes from subthreshold voltage fluctuations, we first generated a “Smoothed Trace”  
661 (ST) by averaging the fluorescence trace using a moving window of  $\pm 100$  frames. To estimate  
662 baseline fluctuation, we first removed potential spikes by replacing any fluorescence values above  
663 ST with the corresponding values of ST. The amplitude of the baseline fluctuation was then  
664 estimated as 2 times the standard deviation of the resulting trace, since half of the fluctuations  
665 were removed in the spike removal step described above. For spike SBR estimation, we also  
666 subtracted the camera intrinsic noise (standard deviation = 12.6 per pixel) from the trace noise to  
667 obtain camera-independent estimates.

668 For spike detection, we first removed small subthreshold rapid signal changes by replacing the  
669 fluorescence below ST with corresponding values of ST. The derivative of the resulting trace was  
670 then used for spike detection, where spikes were identified as the time points above 4.5 times of  
671 the standard deviation of the resulting derivative trace. Spike amplitude was calculated as the  
672 peak fluorescence for each spike minus the mean of the fluorescence during the three time points  
673 before spike onset. Spike SBR was calculated as spike amplitude divided by the amplitude of  
674 baseline fluctuations described above.

#### 675 **Pearson correlation analysis**

676 Pearson cross-correlation was performed using the Matlab functions *corrcoef* and *xcorr*, for both  
677 Vm-Vm and spike-spike correlation analysis. To calculate spike-spike correlation, spike vectors  
678 were smoothed over a  $\pm 10$  ms time window for each spike before applying correlation analysis.  
679 To calculate Vm-Vm correlation, we removed spikes by replacing 3 data point centered at each  
680 identified spike times with the adjacent values that largely eliminated the contribution of spikes  
681 in Vm-Vm correlation analysis.

#### 682 **Statistical analysis**

683 Paired student’s t-tests were used for comparisons involving the same neurons between the  
684 targeted illumination condition and the widefield illumination condition. A Kolmogorov-Smirnov  
685 test was used to test the difference of cross-correlation over distance between targeted  
686 illumination and widefield illumination conditions. For Kolmogorov-Smirnov test, the data in  
687 each of the two conditions were first sorted by distance before comparing. A Friedman’s test, 2  
688 factor non-parametric ANOVA, was used to compare the difference between the average  
689 correlations of each bin in Fig. 3.

#### 690 **Data and software availability statement**

691 Codes used for data analysis is available on our lab website and Github repository:  
692 <https://www.bu.edu/hanlab/resources/> and <https://github.com/HanLabBU>  
693

694 **References**

- 695 1. Gong, Y. *et al.* High-speed recording of neural spikes in awake mice and flies with a  
696 fluorescent voltage sensor. *Science* **350**, (2015).
- 697 2. Abdelfattah, A. S. *et al.* Bright and photostable chemigenetic indicators for extended in  
698 vivo voltage imaging. *Science* **365**, (2019).
- 699 3. Piatkevich, K. D. *et al.* Population imaging of neural activity in awake behaving mice.  
700 *Nature* **574**, (2019).
- 701 4. Villette, V. *et al.* Ultrafast two-photon imaging of a high-gain voltage indicator in awake  
702 behaving mice. *Cell* **179**, (2019).
- 703 5. Adam, Y. *et al.* Voltage imaging and optogenetics reveal behaviour-dependent changes in  
704 hippocampal dynamics. *Nature* **569**, (2019).
- 705 6. Fan, L. Z. *et al.* All-optical electrophysiology reveals the role of lateral inhibition in sensory  
706 processing in cortical layer 1. *Cell* **180**, (2020).
- 707 7. Gong, Y., Wagner, M. J., Li, J. Z. & Schnitzer, M. J. Imaging neural spiking in brain tissue  
708 using FRET-opsin protein voltage sensors. *Nature Communications* **5**, (2014).
- 709 8. Bando, Y., Grimm, C., Cornejo, V. H. & Yuste, R. Genetic voltage indicators. *BMC Biology*  
710 vol. 17 (2019).
- 711 9. Lee, S. *et al.* Improving a genetically encoded voltage indicator by modifying the  
712 cytoplasmic charge composition. *Scientific Reports* **7**, (2017).
- 713 10. Xu, Y., Zou, P. & Cohen, A. E. Voltage imaging with genetically encoded indicators.  
714 *Current Opinion in Chemical Biology* **39**, (2017).
- 715 11. Kannan, M., Vasan, G. & Pieribone, V. A. Optimizing strategies for developing genetically  
716 encoded voltage indicators. *Frontiers in Cellular Neuroscience* **13**, (2019).
- 717 12. Beck, C., Zhang, D. & Gong, Y. Enhanced genetically encoded voltage indicators advance  
718 their applications in neuroscience. *Current Opinion in Biomedical Engineering* **12**, (2019).
- 719 13. Knöpfel, T. & Song, C. Optical voltage imaging in neurons: moving from technology  
720 development to practical tool. *Nature Reviews Neuroscience* **20**, (2019).
- 721 14. Peng, L., Xu, Y. & Zou, P. Genetically-encoded voltage indicators. *Chinese Chemical*  
722 *Letters* **28**, (2017).
- 723 15. Piatkevich, K. D. *et al.* A robotic multidimensional directed evolution approach applied to  
724 fluorescent voltage reporters article. *Nature Chemical Biology* **14**, (2018).
- 725 16. Abdelfattah, A. S. *et al.* A general approach to engineer positive-going eFRET voltage  
726 indicators. *Nature Communications* **11**, (2020).
- 727 17. Ma, Y., Bayguinov, P. O. & Jackson, M. B. Optical studies of action potential dynamics  
728 with hVOS probes. *Current Opinion in Biomedical Engineering* **12**, (2019).



- 729 18. Mertz, J. *Introduction to optical microscopy. Introduction to Optical Microscopy* (2019).  
730 doi:10.1017/9781108552660.
- 731 19. Wu, J. *et al.* Kilohertz two-photon fluorescence microscopy imaging of neural activity in  
732 vivo. *Nature Methods* **17**, (2020).
- 733 20. Mertz, J. Optical sectioning microscopy with planar or structured illumination. *Nature*  
734 *Methods* **8**, (2011).
- 735 21. Harris, K. D., Quiroga, R. Q., Freeman, J. & Smith, S. L. Improving data quality in neuronal  
736 population recordings. *Nature Neuroscience* **19**, (2016).
- 737 22. Lim, S. T., Antonucci, D. E., Scannevin, R. H. & Trimmer, J. S. A novel targeting signal for  
738 proximal clustering of the Kv2.1 K<sup>+</sup> channel in hippocampal neurons. *Neuron* **25**, (2000).
- 739 23. Xiao, S., Tseng, H. A., Gritton, H., Han, X. & Mertz, J. Video-rate volumetric neuronal  
740 imaging using 3D targeted illumination. *Scientific Reports* **8**, (2018).
- 741 24. Ishimaru, A. *Wave propagation and scattering in random media. Wave Propagation and*  
742 *Scattering in Random Media* (1999). doi:10.1109/9780470547045.
- 743 25. Brivanlou, I. H., Dantzker, J. L. M., Stevens, C. F. & Callaway, E. M. Topographic specificity  
744 of functional connections from hippocampal CA3 to CA1. *Proceedings of the National*  
745 *Academy of Sciences of the United States of America* **101**, (2004).
- 746 26. Helmchen, F. & Denk, W. Deep tissue two-photon microscopy. *Nature Methods* **2**,  
747 (2005).
- 748 27. Kazemipour, A. *et al.* Kilohertz frame-rate two-photon tomography. *Nature Methods* **16**,  
749 (2019).
- 750 28. Zhang, T. *et al.* Kilohertz two-photon brain imaging in awake mice. *Nature Methods* **16**,  
751 (2019).
- 752 29. Pnevmatikakis, E. A. & Giovannucci, A. NoRMCorre: An online algorithm for piecewise  
753 rigid motion correction of calcium imaging data. *Journal of Neuroscience Methods* **291**,  
754 (2017).
- 755 30. Mohammed, A. I. *et al.* An integrative approach for analyzing hundreds of neurons in  
756 task performing mice using wide-field calcium imaging. *Scientific Reports* **6**, (2016).
- 757 31. Griffiths, V. A. *et al.* Real-time 3D movement correction for two-photon imaging in  
758 behaving animals. *Nature Methods* **17**, (2020).
- 759 32. Jacques, S. L. Optical properties of biological tissues: A review. *Physics in Medicine and*  
760 *Biology* **58**, (2013).
- 761 33. Stokseth, P. A. Properties of a defocused optical system. *Journal of the Optical Society of*  
762 *America* **59**, (1969).

763 34. Yaroslavsky, A. N. *et al.* Optical properties of selected native and coagulated human  
764 brain tissues in vitro in the visible and near infrared spectral range. *Physics in Medicine*  
765 *and Biology* **47**, (2002).

766

767
